# Supplementary material
Source: MDPI journal article supplement (https://www.mdpi.com/2624-7402/3/2/17)
Supplement: s1 [file s1]

We have provided code to run the models for *Asparagopsis armata*. To run for *Asparagopsis taxiformis*, simply change the species code and the geographic area of the native and non-native range. The GBIF citations can be found in the manuscript. Please note that due to the stochasticity of cross-validation and pseudo-absence generation, results will vary slightly from the main findings of this manuscript. Names of the models correspond to those run in the manuscript, so please refer to that document for reference.

To download the shapefiles for which we defined our geographic area, please visit <https://www.marineregions.org> (Flanders Marine Institute 2019). For Ireland we used Irish Exclusive Economic Zone , for Australia we used Australian Exclusive Economic Zone , for New Zealand we used New Zealand Exclusive Economic Zone , and for Portugal we used Portuguese Exclusive Economic Zone, Portuguese Exclusive Economic Zone (Azores) and Portuguese Exclusive Economic Zone (Madeira) merged into a single shapefile.

We have provided step by step instructions to fit the species distribution models (SDMs) following the methodology of Guisan et al (2017). Please refer to their book for a much more detailed account for fitting SDMs.

Guisan, A.; Thuiller, W.; Zimmerman, N.E. 2017. *Habitat Suitability and Distribution Models: With Applications in R*. Cambridge University Press, UK.

Flanders Marine Institute 2019. Maritime Boundaries Geodatabase: Maritime Boundaries and Exclusive Economic Zones (200NM), version 11. Available online at <https://www.marineregions.org>. <https://doi.org/10.14284/386>
